# Supplementary material
Source: ML conference proceedings conference paper supplement (https://aclanthology.org/D16-1178)
Supplement: Attachment [file supplementary.pdf › supplementary.pdf]

# Supplement to Friends with Motives: Using Text to Infer Influence on SCOTUS

|                                                                                                                                      |                                                                                                                                     |                                                                                                                                           |
|--------------------------------------------------------------------------------------------------------------------------------------|-------------------------------------------------------------------------------------------------------------------------------------|-------------------------------------------------------------------------------------------------------------------------------------------|
| <b>Yanchuan Sim</b><br>Language Technologies Institute<br>Carnegie Mellon University<br>Pittsburgh, PA 15213, USA<br>ysim@cs.cmu.edu | <b>Bryan Routledge</b><br>Tepper School of Business<br>Carnegie Mellon University<br>Pittsburgh, PA 15213, USA<br>routledge@cmu.edu | <b>Noah A. Smith</b><br>Computer Science & Engineering<br>University of Washington<br>Seattle, WA 98195, USA<br>nasmith@cs.washington.edu |
|--------------------------------------------------------------------------------------------------------------------------------------|-------------------------------------------------------------------------------------------------------------------------------------|-------------------------------------------------------------------------------------------------------------------------------------------|

## A Modeling details

**Votes model.** The joint likelihood of our votes model is

$$\begin{aligned}
 \mathcal{L}^{\text{vote}}(\mathbf{a}, \mathbf{b}, \boldsymbol{\psi}, \boldsymbol{\theta}, \boldsymbol{\Delta}, \boldsymbol{\chi}, \boldsymbol{\pi}, \mathbf{z}, \mathbf{v}, \mathbf{w}) & \\
 \propto \prod_{t=1}^T p(\phi_t \mid \beta) & \\
 \times \prod_{j \in \mathcal{J}} p(\boldsymbol{\psi}_j \mid \sigma_j^2, \rho) p(\boldsymbol{\chi}_j \mid \sigma_j^2) & \\
 \times \prod_{e \in \mathcal{E}} p(\pi_e \mid \sigma_P^2) & \\
 \times \prod_{i \in \mathcal{C}} p(a_i, b_i \mid \sigma_C^2) p(\boldsymbol{\theta}_i \mid \alpha) \prod_{k \in \mathcal{A}_i} p(\boldsymbol{\Delta}_{i,k} \mid \alpha) & \\
 \times \prod_{i \in \mathcal{C}} \prod_n p(z_{i,n}^{(m)} \mid \boldsymbol{\theta}_i) p(w_{i,n}^{(m)} \mid \phi_{z_{i,n}^{(m)}}) & \\
 \times \prod_{i \in \mathcal{C}} \prod_{k \in \mathcal{A}_i} \prod_n p(z_{i,k,n}^{(a)} \mid \boldsymbol{\theta}_i) p(w_{i,k,n}^{(a)} \mid \phi_{z_{i,k,n}^{(a)}}) & \\
 \times \prod_{i \in \mathcal{C}} \prod_{k \in \mathcal{A}_i} \exp(\eta^{\text{vote}} U_{i,k}^{\text{vote}}(\boldsymbol{\Delta}_{i,k})) & \\
 \times \prod_{i \in \mathcal{C}} \prod_{j \in \mathcal{J}_i} V_{i,j} &
 \end{aligned}$$

where

$$V_{i,j} = p(v_{i,j} \mid a_i, b_i, \boldsymbol{\psi}_j, \boldsymbol{\theta}_i, \boldsymbol{\Delta}_i, \boldsymbol{\chi}_j, \boldsymbol{\pi})$$

and

$$U_{i,k}^{\text{vote}}(\boldsymbol{\Delta}_{i,k}) = \frac{1}{|\mathcal{J}_i|} \sum_{j \in \mathcal{J}_i} V_{i,j} - H^2(\boldsymbol{\Delta}_{i,k}, \boldsymbol{\theta}_i)$$

We first initialize the topic mixtures  $(\boldsymbol{\theta}, \boldsymbol{\Delta})$  and topic-word distributions  $(\phi)$  of the model using la-

tent Dirichlet allocation.<sup>1</sup> In each iteration, we sampled the latent variables  $\mathbf{a}, \mathbf{b}, \boldsymbol{\psi}, \boldsymbol{\theta}, \boldsymbol{\Delta}, \boldsymbol{\chi}$ , and  $\boldsymbol{\pi}$  in turn using the Metropolis-Hastings algorithm (Hastings, 1970). We discarded samples from the first 1,500 iterations (burn-in) and keeping every 10th subsequent sample to compute the posterior mean. In total, we performed 3,000 iterations over the data.

**Opinions model.** The joint likelihood of the opinion model is

$$\begin{aligned}
 \mathcal{L}^{\text{opinion}}(\mathbf{a}, \mathbf{b}, \boldsymbol{\psi}, \boldsymbol{\theta}, \boldsymbol{\Delta}, \boldsymbol{\chi}, \boldsymbol{\pi}, \mathbf{z}, \boldsymbol{\Gamma}, \boldsymbol{\tau}, \mathbf{x}, \mathbf{v}, \mathbf{w}) & \\
 \propto \mathcal{L}^{\text{vote}}(\mathbf{a}, \mathbf{b}, \boldsymbol{\psi}, \boldsymbol{\theta}, \boldsymbol{\Delta}, \boldsymbol{\chi}, \boldsymbol{\pi}, \mathbf{z}, \mathbf{v}, \mathbf{w}) & \\
 \times \prod_{j \in \mathcal{J}} p(\boldsymbol{\Gamma}_j \mid \alpha) & \\
 \times \prod_{i \in \mathcal{C}} \prod_{s \in \{\text{p}, \text{r}\}} p(\tau_i^s \mid \gamma^s(\mathbf{v}_i)) & \\
 \times \prod_{i \in \mathcal{C}} \prod_{s \in \{\text{p}, \text{r}\}} \prod_n p(x_{i,s,n} \mid \tau_i^s) & \\
 \times \prod_{i \in \mathcal{C}} \prod_{s \in \{\text{p}, \text{r}\}} \prod_n p(z_{i,s,n}^{(o)} \mid x_{i,s,n}, \boldsymbol{\Gamma}, \boldsymbol{\theta}_i, \boldsymbol{\Delta}_i^s) & \\
 \times \prod_{i \in \mathcal{C}} \prod_{s \in \{\text{p}, \text{r}\}} \prod_n p(w_{i,s,n}^{(o)} \mid \phi_{z_{i,s,n}^{(o)}}) & \\
 \times \prod_{i \in \mathcal{C}} \prod_{k \in \mathcal{A}_i} \exp(\eta^{\text{opinion}} U_{i,k}^{\text{opinion}}(\boldsymbol{\Delta}_{i,k})) &
 \end{aligned}$$

<sup>1</sup>We used the online variational Bayes algorithm (Hoffman et al., 2010) implementation found in Python `scikit-learn` (Pedregosa et al., 2011).

where

$$\gamma^s(\mathbf{v}_i) = \begin{bmatrix} V_{i,1} \\ \vdots \\ V_{i,|\mathcal{J}_i|} \\ 1 \\ 1 \end{bmatrix},$$

$$U_{i,k}^{\text{opinion}}(\Delta_{i,k}) = 1 - H^2(\Delta_{i,k}, \Omega^{s_{i,k}}) - H^2(\Delta_{i,k}, \theta_i),$$

and

$$\Omega^s = [\Gamma_1, \dots, \Gamma_{|\mathcal{J}_i|}, \theta_i, \Delta_i^s] \frac{\gamma^s(\mathbf{v}_i)}{\|\gamma^s(\mathbf{v}_i)\|_1}$$

After estimating the parameters for the vote model, we held all the parameters of the vote model fixed and estimate the opinion model parameters  $(\Gamma, \tau, x)$  using the Metropolis-Hastings algorithm. We discarded samples from the first 2,500 iterations (burn-in) and keeping every 10th subsequent sample to compute the posterior mean. In total, we performed 5,000 iterations over the opinions model.

## B Hyperparameters

Table 1 presents the hyperparameters for our final models. We experimented with  $\sigma_I^2 \in \{0.25, 0.5, 1, 2\}$ ,  $\sigma_P^2 \in \{0.25, 0.5, 1, 2\}$ ,  $\eta^{\text{vote}} \in \{0.125, 0.25, 0.5, 1, 2, 4\}$ , and  $\eta^{\text{opinion}} \in \{0.125, 0.25, 0.5, 1, 2, 4\}$ , to find the best parameters using 5-fold cross validation on accuracy and perplexity.

## C Justice opinion topics

Table 2 presents the top 3 topics associated with each justice’s opinions topic mixture.

## References

- W. K. Hastings. 1970. Monte Carlo sampling methods using Markov chains and their applications. *Biometrika*, 57(1):97–109.
- Matthew Hoffman, Francis R. Bach, and David M. Blei. 2010. Online learning for latent Dirichlet allocation. In *Advances in Neural Information Processing Systems* 23.
- F. Pedregosa, G. Varoquaux, A. Gramfort, V. Michel, B. Thirion, O. Grisel, M. Blondel, P. Prettenhofer, R. Weiss, V. Dubourg, J. Vanderplas, A. Passos,

D. Cournapeau, M. Brucher, M. Perrot, and E. Duchesnay. 2011. Scikit-learn: Machine learning in Python. *Journal of Machine Learning Research*, 12:2825–2830. Available at <http://scikit-learn.org/>.

| Description                                       | Symbol                  | Value         |
|---------------------------------------------------|-------------------------|---------------|
| No. of topics                                     | $T$                     | 128           |
| Document-topic ( $\theta, \Delta, \Gamma$ ) prior | $\alpha$                | $\frac{1}{T}$ |
| Topic-word ( $\phi$ ) prior                       | $\beta$                 | 0.001         |
| Justice IP ( $\psi$ ) diagonal variance           | $\sigma_J^2$            | 1.0           |
| Justice influenceability ( $\chi$ ) scale         | $\sigma_I^2$            | 0.5           |
| Amicus persuasiveness ( $\pi$ ) scale             | $\sigma_P^2$            | 1             |
| Case parameters ( $a, b$ ) variance               | $\sigma_C^2$            | 4             |
| Vote model utility function weight                | $\eta^{\text{vote}}$    | 1             |
| Opinion model utility function weight             | $\eta^{\text{opinion}}$ | 2             |

**Table 1:** Final hyperparameter settings for our model.

|                                                                       |
|-----------------------------------------------------------------------|
| John G. Roberts                                                       |
| 32: speech, first amendment, free speech, message, expression         |
| 61: eeoc, title vii, discrimination, woman, civil rights act          |
| 52: sec, fraud, security, investor, section ##b                       |
| Ruth B. Ginsburg                                                      |
| 61: eeoc, title vii, discrimination, woman, civil rights act          |
| 80: class, settlement, rule ##, class action, r civ                   |
| 96: taxpayer, bank, corporation, fund, irs                            |
| Antonin Scalia                                                        |
| 94: 42 USC 1983, qualified immunity, immunity, official, section #### |
| 57: president, senate, executive, article, framer                     |
| 80: class, settlement, rule ##, class action, r civ                   |
| Elena Kagan                                                           |
| 34: candidate, buckley, 424 US 1, contribution, fec                   |
| 96: taxpayer, bank, corporation, fund, irs                            |
| 105: fda, drug, manufacturer, product, federal law                    |
| Stephen Breyer                                                        |
| 96: taxpayer, bank, corporation, fund, irs                            |
| 61: eeoc, title vii, discrimination, woman, civil rights act          |
| 15: plea, trial counsel, strickland, magistrate, guilty plea          |
| Anthony M. Kennedy                                                    |
| 57: president, senate, executive, article, framer                     |
| 94: 42 USC 1983, qualified immunity, immunity, official, section #### |
| 15: plea, trial counsel, strickland, magistrate, guilty plea          |
| Sonia Sotomayor                                                       |
| 22: sentence, offense, release, guidelines, guideline                 |
| 23: legislature, voter, race, 42 USC 1973, minority voter             |
| 52: sec, fraud, security, investor, section ##b                       |
| Samuel A. Alito                                                       |
| 32: speech, first amendment, free speech, message, expression         |
| 61: eeoc, title vii, discrimination, woman, civil rights act          |
| 52: sec, fraud, security, investor, section ##b                       |
| Clarence Thomas                                                       |
| 5: federal government, framer, commerce, commerce clause, lopez       |
| 32: speech, first amendment, free speech, message, expression         |
| 72: due process, liberty, fourteenth amendment, hearing, forfeiture   |

**Table 2:** Top 3 topics contributed to Court opinions for recently active justices ( $\Gamma$ ).
